# Supplementary material
Source: MDPI journal article supplement (https://www.mdpi.com/2072-4292/12/15/2396)

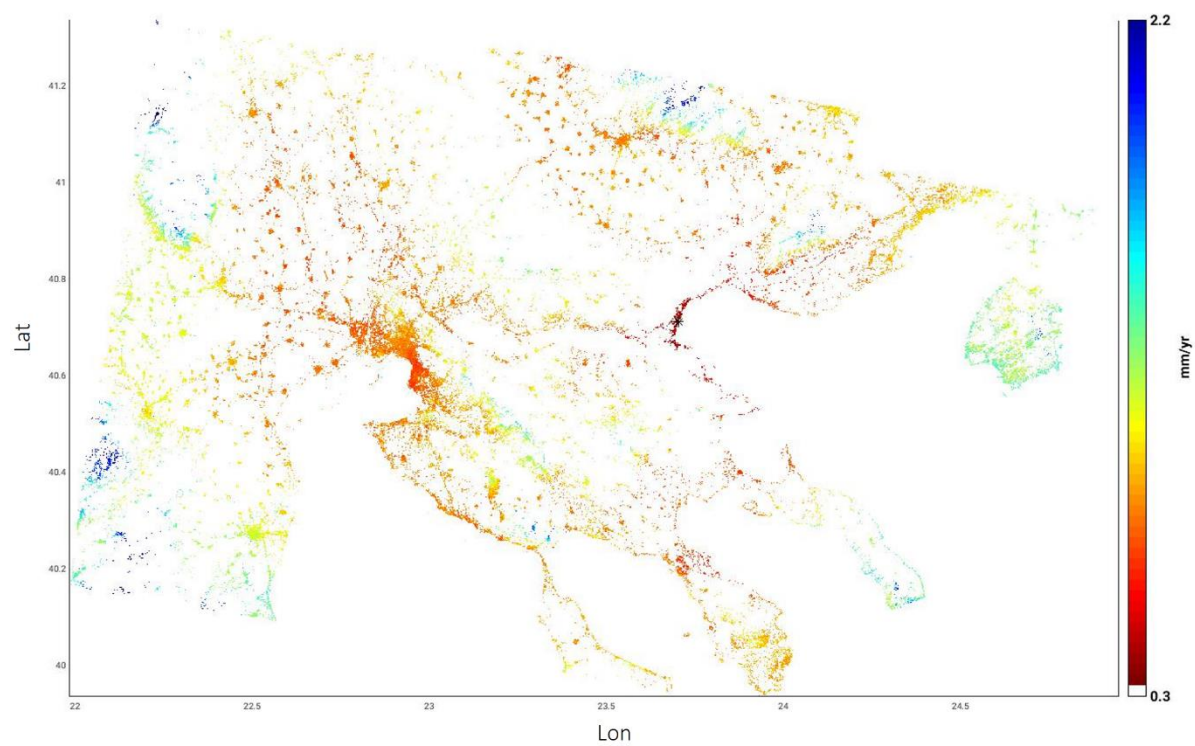

**Figure S1.** Standard deviation of the PS S-1 results

Supplement: s1 [file s1]
